# Supplementary figures and images for: Phase II studies of nebulised Arikace in CF patients with Pseudomonas aeruginosa infection
Source: PubMed Central journal article supplement — Thorax. 2013 Jun 8;68(9):818–25. doi: 10.1136/thoraxjnl-2012-202230 (PMC3756431; doi:10.1136/thoraxjnl-2012-202230), 2013-06-08

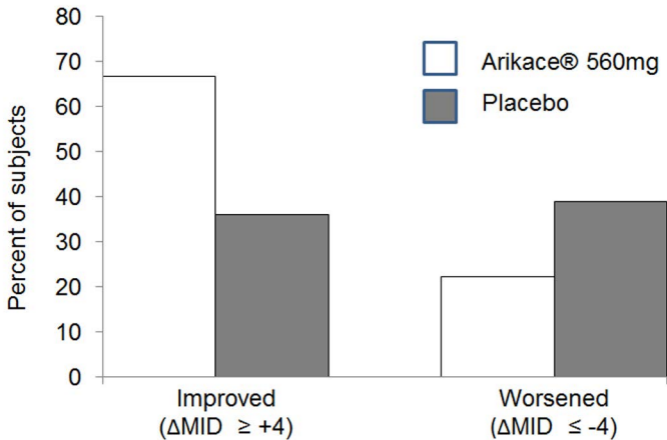

Supplement: thoraxjnl-2012-202230-s3.pdf [file thoraxjnl-2012-202230-s3.pdf]

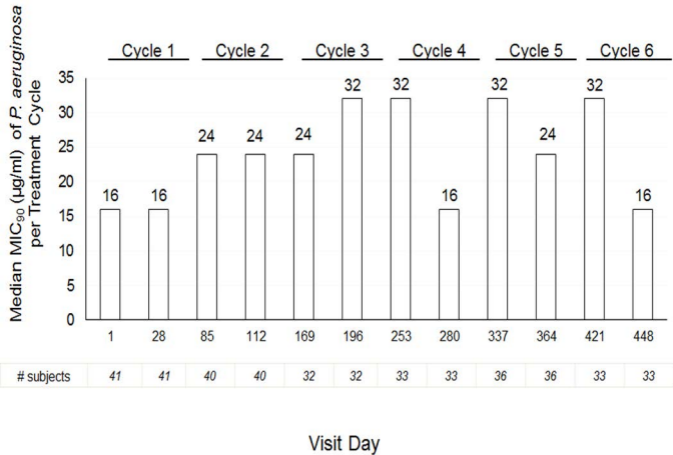

Supplement: thoraxjnl-2012-202230-s4.pdf [file thoraxjnl-2012-202230-s4.pdf]
