# Supplementary figures and images for: Phase II studies of nebulised Arikace in CF patients withPseudomonas aeruginosainfection
Source: HighWire-hosted journal article supplement (doi:10.1136/thoraxjnl-2012-202230), 2013-06-08

Patients screened, N = 133

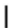

Patients randomized, N = 112

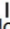

105 dosed \*

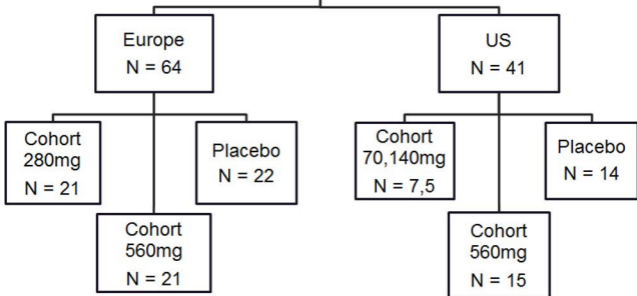

Supplement: thoraxjnl-2012-202230supp_figure1.pdf [file thoraxjnl-2012-202230supp_figure1.pdf]
